# Supplementary material for: Molecular alterations associated with improved outcome in patients with glioblastoma treated with Tumor-Treating Fields
Source: PubMed Central journal article supplement (PMC9270729; doi:10.1093/noajnl/vdac096), 2022-06-21

# Supplemental Figure 1

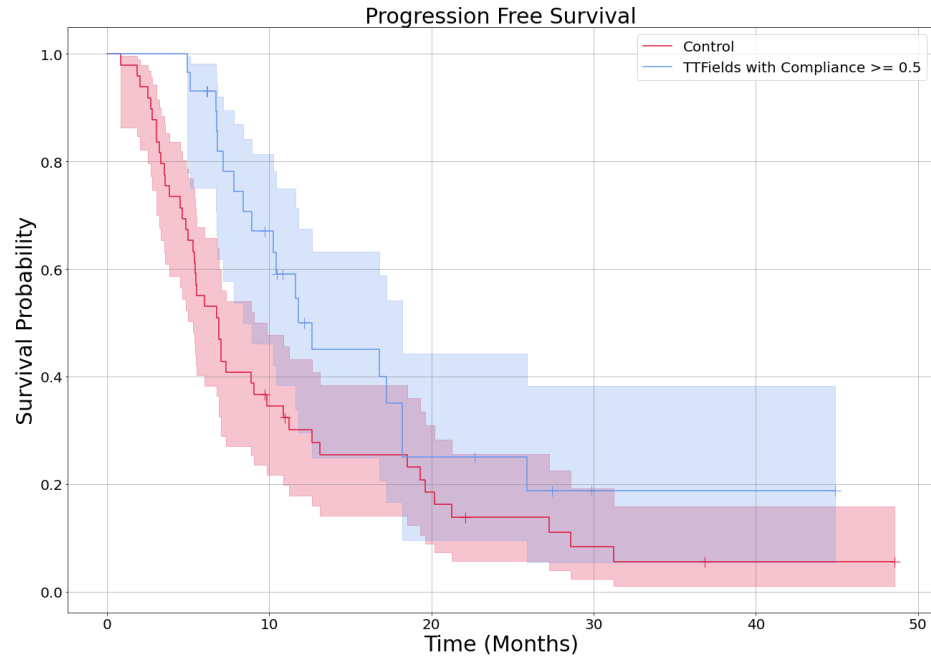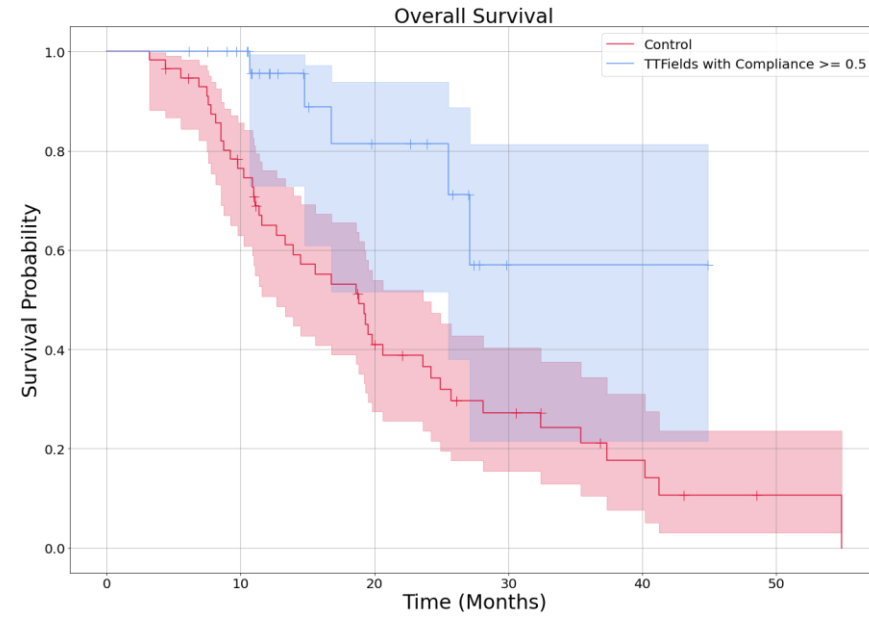

|         | <b>p value</b> | <b>Survival</b> | <b>HR</b> | <b>Lower 95%</b> | <b>Upper 95%</b> | <b>TTFields n</b> | <b>Control n</b> | <b>TTFields censored</b> | <b>Control censored</b> |
|---------|----------------|-----------------|-----------|------------------|------------------|-------------------|------------------|--------------------------|-------------------------|
| PFS 0.5 | 0.0274         | 12.6m vs. 6.9m  | 0.54      | 0.32             | 0.93             | 29                | 49               | 10                       | 5                       |
| OS 0.5  | 0.0041         | 18.8 m vs. NR   | 0.26      | 0.10             | 0.65             | 29                | 57               | 24                       | 14                      |

## Supplemental Figure 2

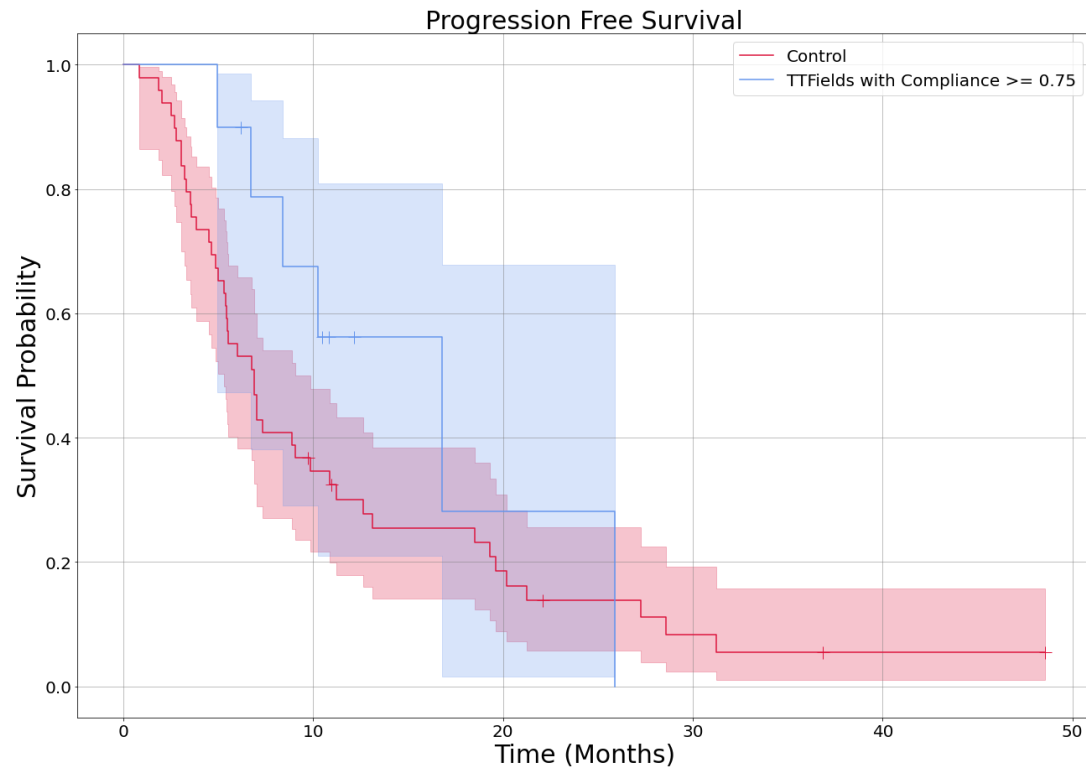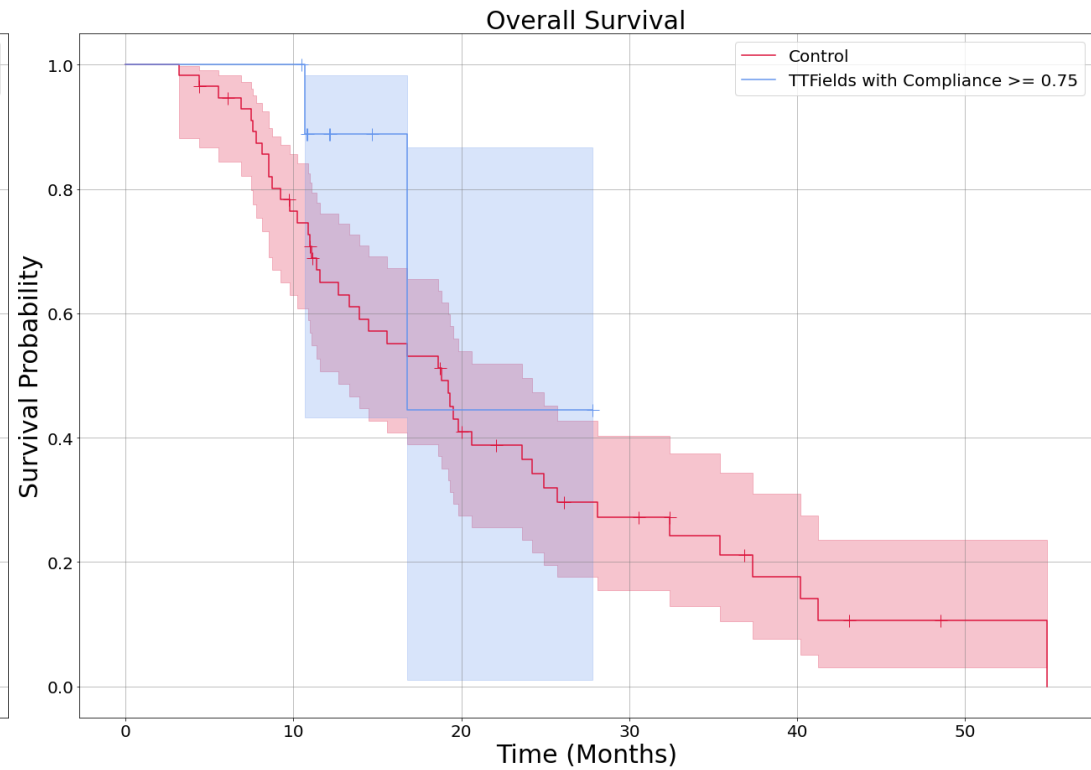

|          | p value | Survival        | HR   | Lower 95% | Upper 95% | TTFields n | Control n | TTFields censored | Control censored |
|----------|---------|-----------------|------|-----------|-----------|------------|-----------|-------------------|------------------|
| PFS 0.75 | 0.23    | 16.8 m vs. 6.9m | 0.59 | 0.25      | 0.39      | 10         | 49        | 4                 | 5                |
| OS 0.75  | 0.25    | 16.8m vs. 18.8m | 0.43 | 0.10      | 1.81      | 10         | 57        | 8                 | 14               |

# Supplemental Figure 3A

A

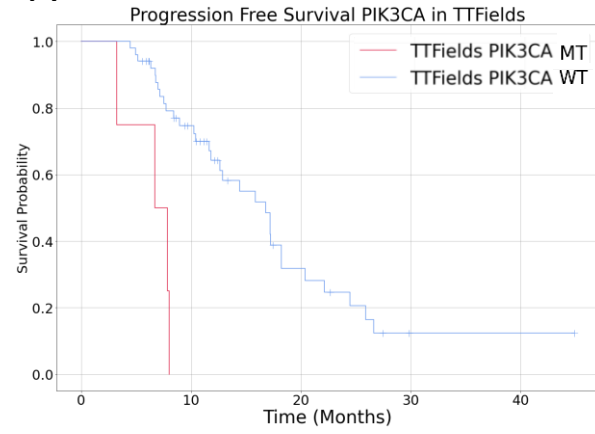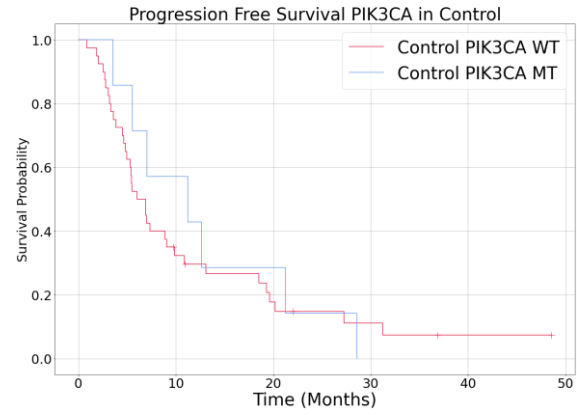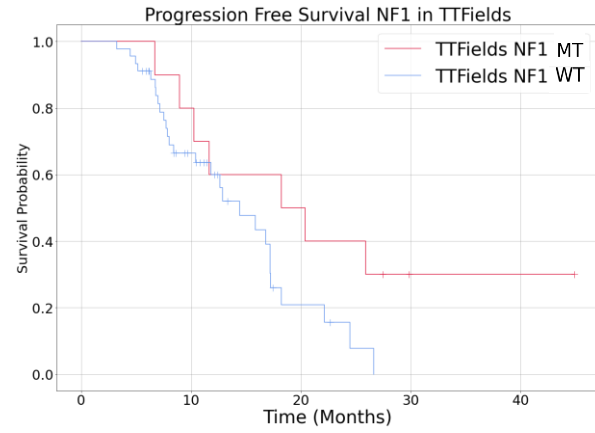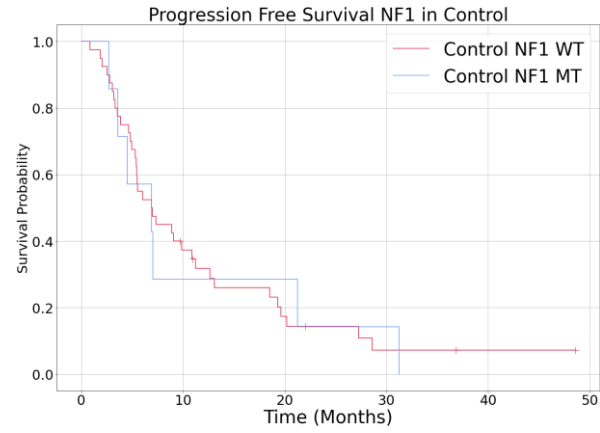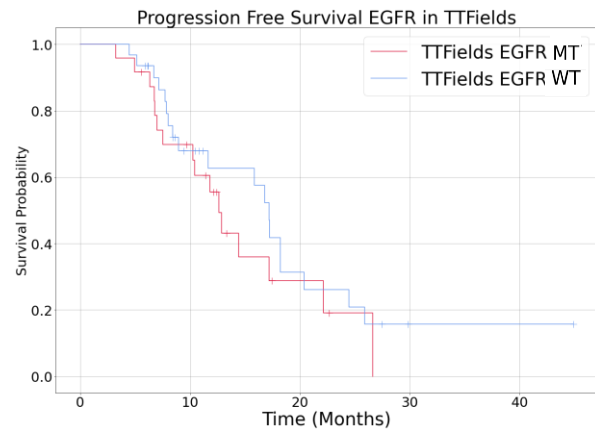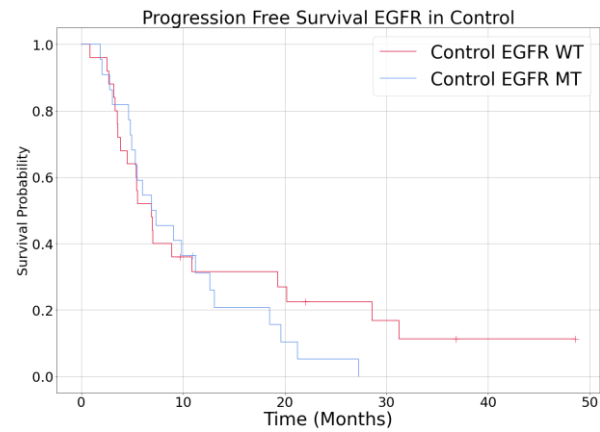

# Supplemental Figure 3B

## B

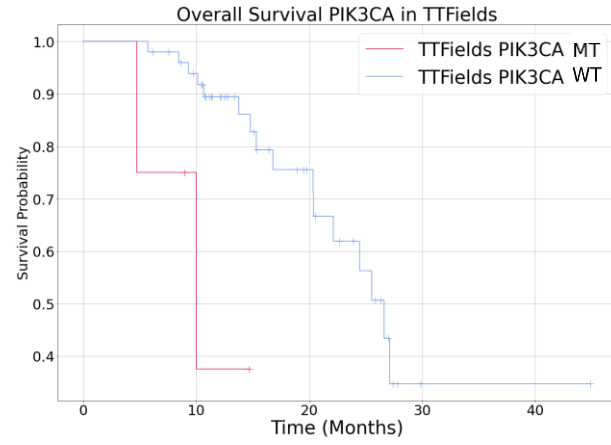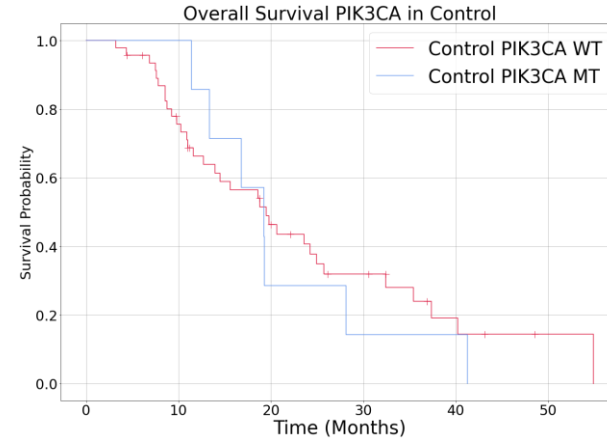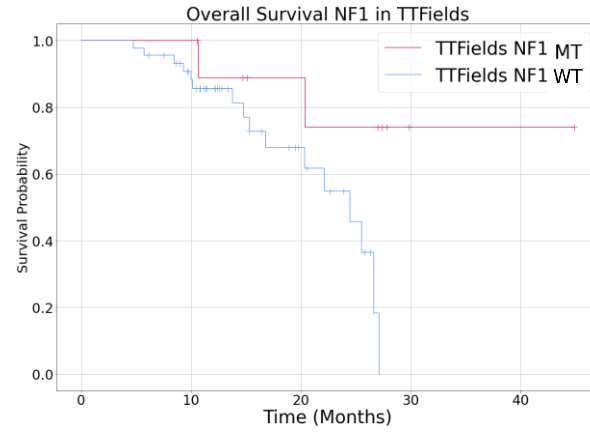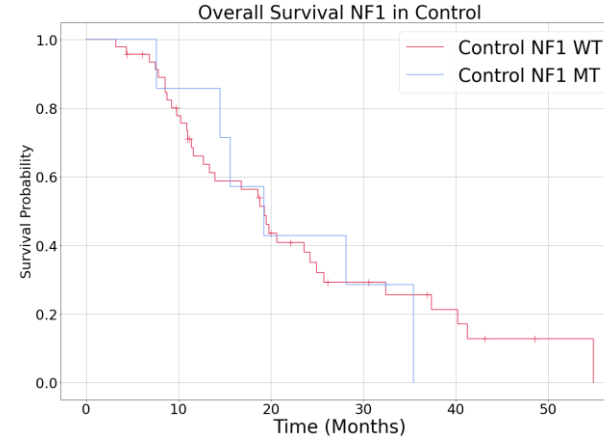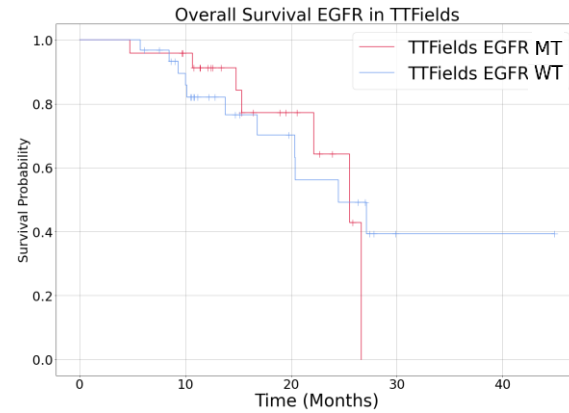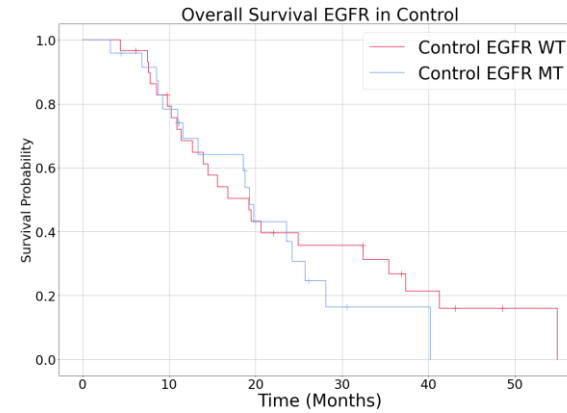

# Supplemental Table 1

|                                 | Progression Free Survival |               | Interaction p-value<br>(Biomarker and therapy) | Overall Survival |               | Interaction p-value<br>(Biomarker and therapy) |
|---------------------------------|---------------------------|---------------|------------------------------------------------|------------------|---------------|------------------------------------------------|
|                                 | TTFields treated          | Control       |                                                | TTFields treated | Control       |                                                |
| <b>PIK3CA Mutated</b>           | 16.8m                     | 11.2m         | 0.0200                                         | 10.0m            | 19.2m         | 0.1196                                         |
| <b>PIK3CA Wild type</b>         | 6.7m                      | 6.0m          |                                                | 26.6 m           | 19.5m         |                                                |
| <b><i>P values [Cox PH]</i></b> | <i>0.0008</i>             | <i>0.6541</i> |                                                | <i>0.0158</i>    | <i>0.6695</i> |                                                |
| <b><i>HR</i></b>                | <i>7.33</i>               | <i>0.83</i>   |                                                | <i>7.38</i>      | <i>1.20</i>   |                                                |
| <b><i>Lower 95%</i></b>         | <i>2.29</i>               | <i>0.36</i>   |                                                | <i>1.46</i>      | <i>0.53</i>   |                                                |
| <b><i>Upper 95%</i></b>         | <i>23.53</i>              | <i>1.88</i>   |                                                | <i>37.40</i>     | <i>2.72</i>   |                                                |
| <b>NF1 Alteration</b>           | 18.2m                     | 6.9m          |                                                | 0.3549           | NR            |                                                |
| <b>NF1 Intact</b>               | 14.4m                     | 6.9m          | 24.7m                                          |                  | 19.2m         |                                                |
| <b><i>P values [Cox PH]</i></b> | <i>0.0744</i>             | <i>0.8933</i> | <i>0.0415</i>                                  |                  | <i>0.8902</i> |                                                |
| <b><i>HR</i></b>                | <i>0.45</i>               | <i>1.06</i>   | <i>0.20</i>                                    |                  | <i>1.06</i>   |                                                |
| <b><i>Lower 95%</i></b>         | <i>0.19</i>               | <i>0.47</i>   | <i>0.04</i>                                    |                  | <i>0.44</i>   |                                                |
| <b><i>Upper 95%</i></b>         | <i>1.08</i>               | <i>2.40</i>   | <i>0.94</i>                                    |                  | <i>2.56</i>   |                                                |
| <b>EGFR Mutated</b>             | 12.6m                     | 6.9m          | 0.7821                                         | 25.3m            | 19.2m         | 0.5290                                         |
| <b>EGFR Intact</b>              | 17.2m                     | 6.9m          |                                                | 24.5m            | 19.3m         |                                                |
| <b><i>P values [Cox PH]</i></b> | <i>0.3628</i>             | <i>0.3776</i> |                                                | <i>0.9462</i>    | <i>0.5149</i> |                                                |
| <b><i>HR</i></b>                | <i>1.37</i>               | <i>1.32</i>   |                                                | <i>0.97</i>      | <i>1.24</i>   |                                                |
| <b><i>Lower 95%</i></b>         | <i>0.70</i>               | <i>0.71</i>   |                                                | <i>0.36</i>      | <i>0.65</i>   |                                                |
| <b><i>Upper 95%</i></b>         | <i>2.69</i>               | <i>2.49</i>   |                                                | <i>2.58</i>      | <i>2.39</i>   |                                                |

## Supplemental Figure 4

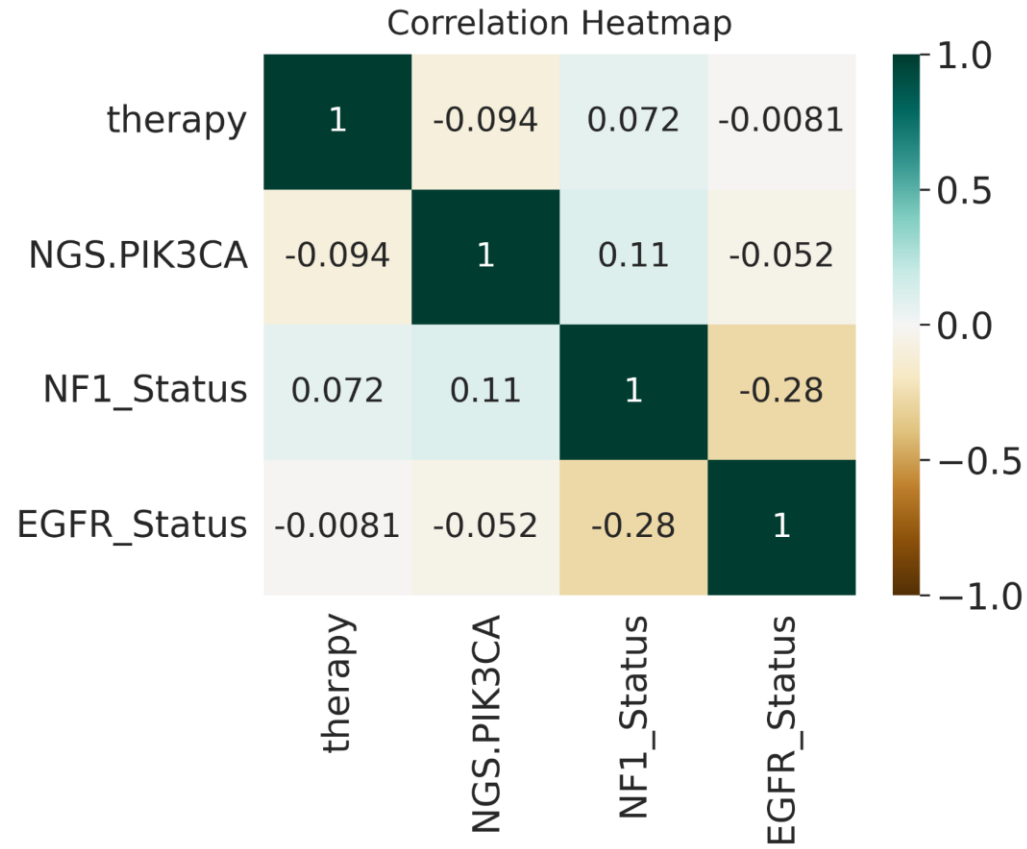

## Supplemental Figure 5

| Model                                           | Progression Free Survival |                | Overall Survival  |                |
|-------------------------------------------------|---------------------------|----------------|-------------------|----------------|
|                                                 | Concordance Index         | Log Likelihood | Concordance Index | Log Likelihood |
| therapy + NGS.PIK3CA                            | 0.62901701                | -289.9317      | 0.59395349        | -215.6307      |
| therapy + NGS.PIK3CA + interaction              | 0.65193762                | -287.60415     | 0.60914729        | -214.64447     |
| therapy + NF1_Status                            | 0.63114367                | -289.7176      | 0.59968992        | -215.40537     |
| therapy + NF1_Status + interaction              | 0.63397921                | -289.29269     | 0.59023256        | -214.18374     |
| therapy + EGFR_Status                           | 0.63031664                | -289.26386     | 0.5772093         | -216.05442     |
| therapy + EGFR_Status + interaction             | 0.63031664                | -289.22558     | 0.59364341        | -215.85441     |
| therapy + NGS.PIK3CA + NF1_Status               | 0.63575142                | -289.45943     | 0.61736434        | -214.61374     |
| therapy + NGS.PIK3CA + EGFR_Status              | 0.63480624                | -289.10403     | 0.5924031         | -215.52514     |
| therapy + NF1_Status + EGFR_Status              | 0.63610586                | -289.09718     | 0.58728682        | -215.39743     |
| therapy + NGS.PIK3CA + NF1_Status + EGFR_Status | 0.64189509                | -288.86793     | 0.60186047        | -214.60448     |

PFS model: therapy + NGS.PIK3CA + NF1\_Status + EGFR\_Status

| covariate   | HR         | Lower 95%  | Upper 95%  | p          |
|-------------|------------|------------|------------|------------|
| EGFR_Status | 1.29955674 | 0.81044579 | 2.08385034 | 0.27677375 |
| NF1_Status  | 0.80728039 | 0.43412151 | 1.50119632 | 0.49879188 |
| NGS.PIK3CA  | 1.27013305 | 0.6457239  | 2.49834018 | 0.48844692 |
| therapy     | 0.61683048 | 0.38110215 | 0.9983671  | 0.04922752 |

# Supplemental Figure 6

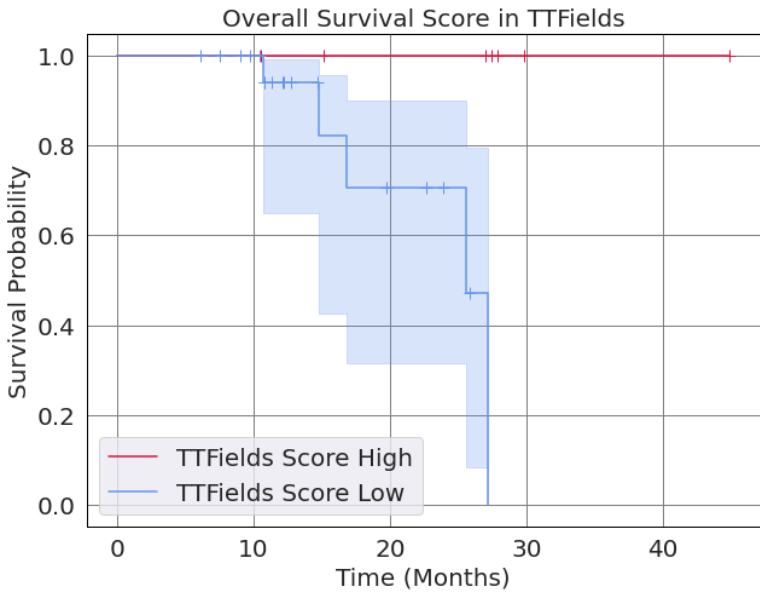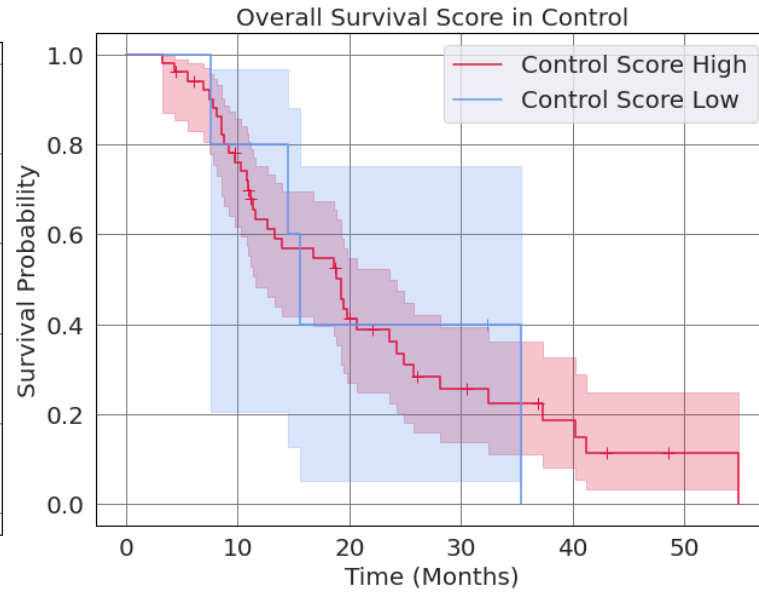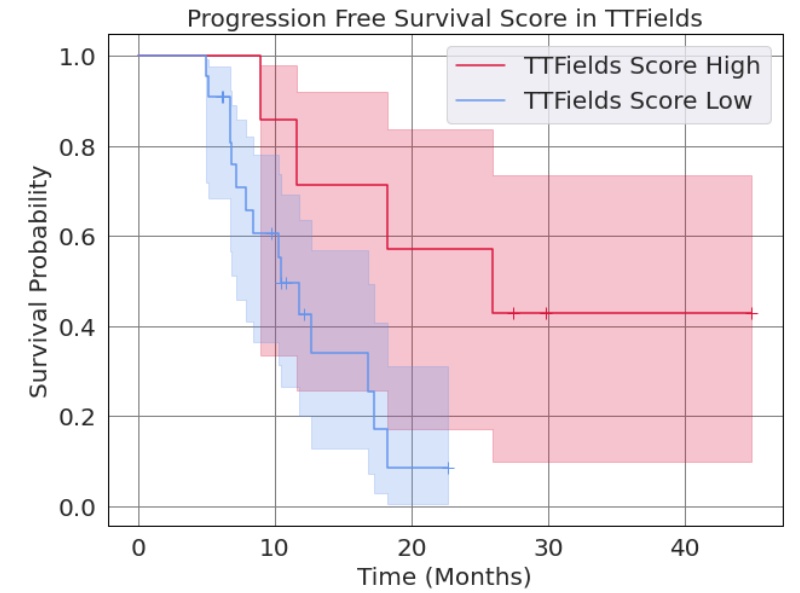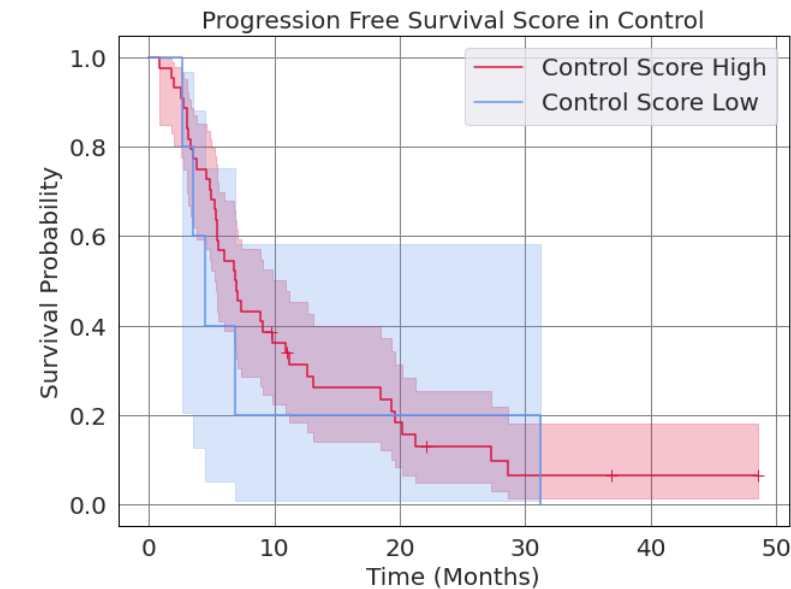

|                                 | > 50% compliance group    |         |                                                |                  |         |                                                |
|---------------------------------|---------------------------|---------|------------------------------------------------|------------------|---------|------------------------------------------------|
|                                 | Progression Free Survival |         | Interaction p-value (Score and therapy) 0.1173 | Overall Survival |         | Interaction p-value (Score and Therapy) 0.9950 |
|                                 | TTFIELDS treated          | Control |                                                | TTFIELDS treated | Control |                                                |
| <b>Score High</b>               | 25.9m                     | 7.0m    | Interaction p-value (Score and therapy) 0.1173 | NR               | 19.2m   | Interaction p-value (Score and Therapy) 0.9950 |
| <b>Score Low</b>                | 10.4m                     | 4.5m    |                                                | 25.5             | 15.6m   |                                                |
| <b><i>P values [Cox PH]</i></b> | 0.0340                    | 0.6485  |                                                | 0.9960           | 0.9847  |                                                |
| <b>HR</b>                       | 0.25                      | 1.25    |                                                | 1.01E-08         | 0.99    |                                                |
| <b>Lower 95%</b>                | 0.07                      | 0.48    |                                                | 0                | 0.35    |                                                |
| <b>Upper 95%</b>                | 0.90                      | 3.22    |                                                | inf              | 2.79    |                                                |



## Supplemental Figure 7

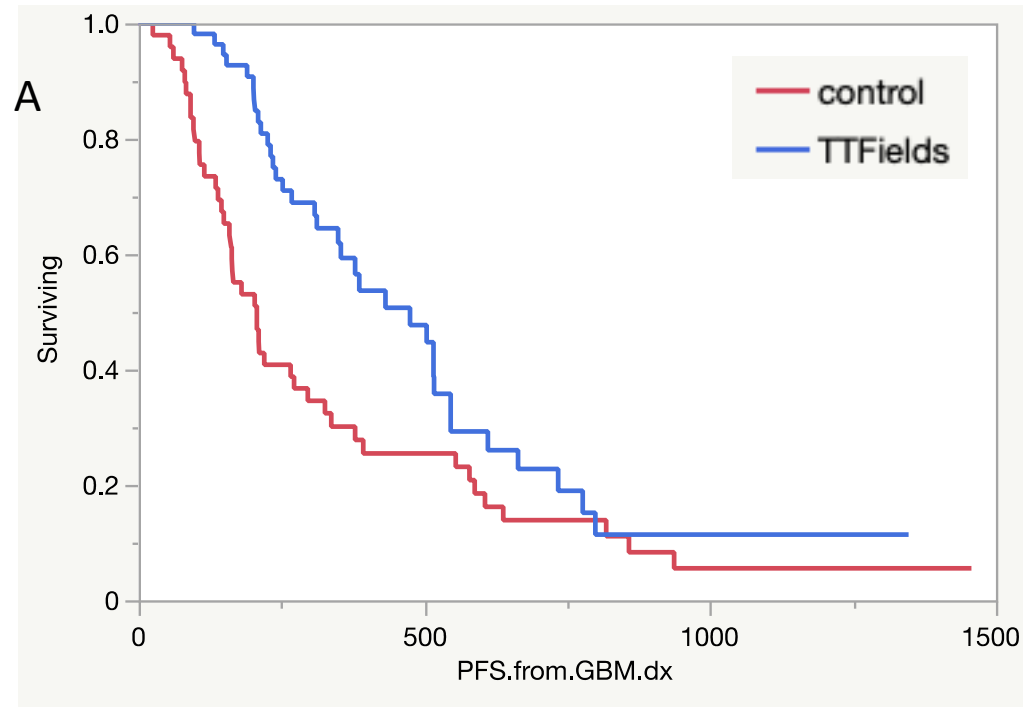

HR: 0.549, [95%CI: 0.35-0.86], p=0.0087

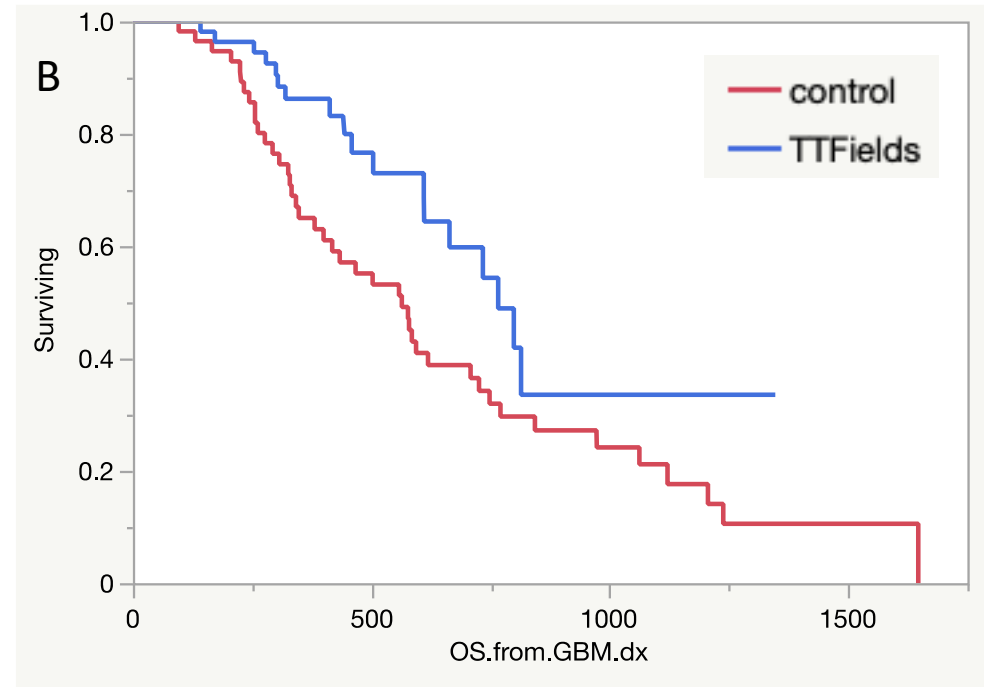

HR: 0.54 [95%CI: 0.31-0.95], p=0.0304

# Supplemental Figure 7

C

Progression-free survival PIK3CA in IDH-WT TTFields

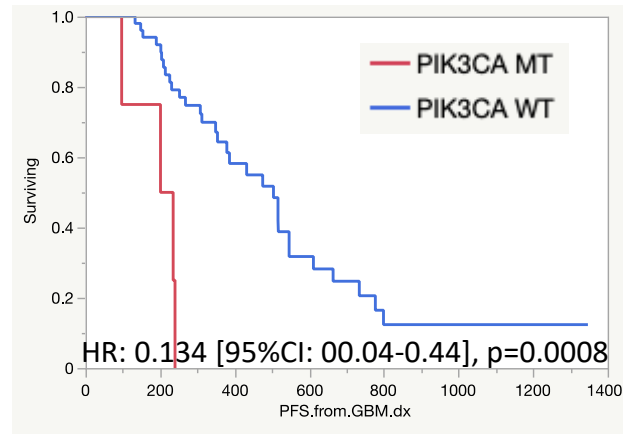

Progression-free survival PIK3CA in IDH-WT Controls

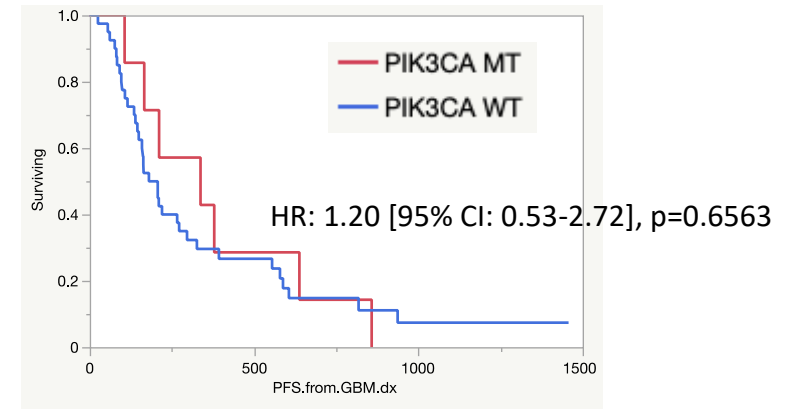

Progression-free survival NF1 in IDH-WT TTFields

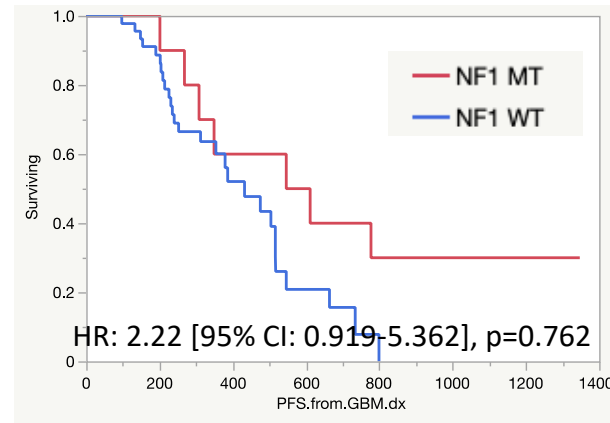

Progression-free survival NF1 IDH-WT Controls

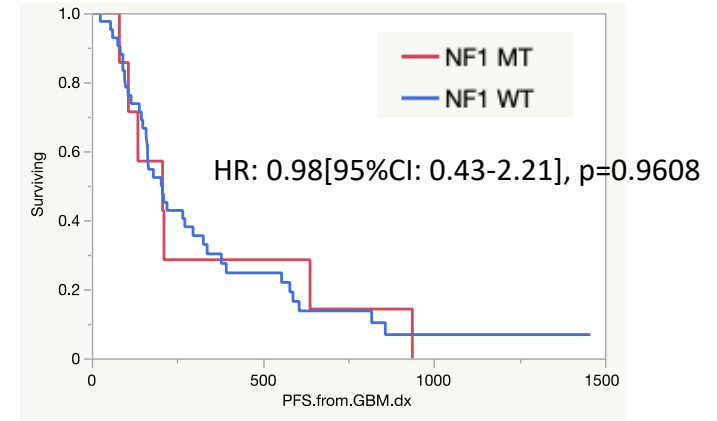

Progression-free survival EGFR IDH-WT TTFields

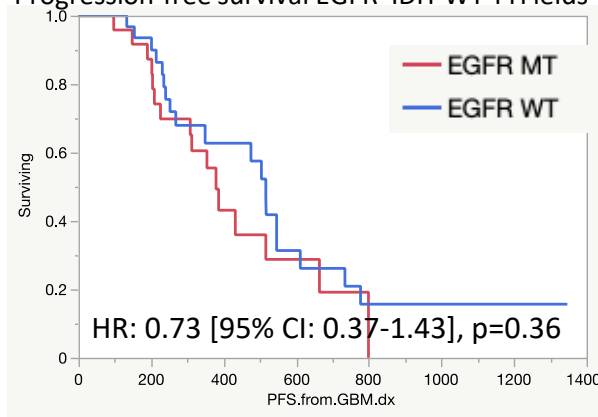

Progression-free survival EGFR IDH-WT Controls

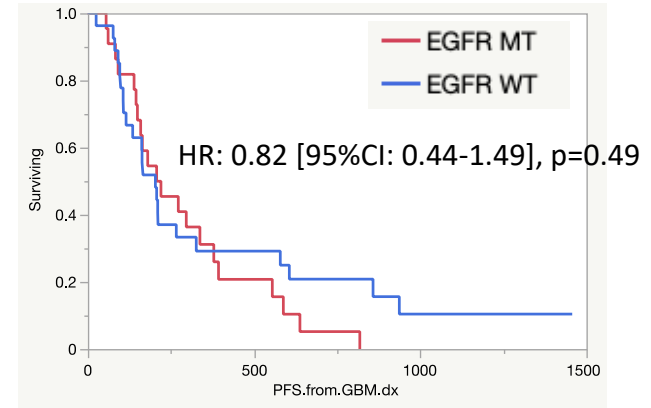

# Supplemental Figure 7

D

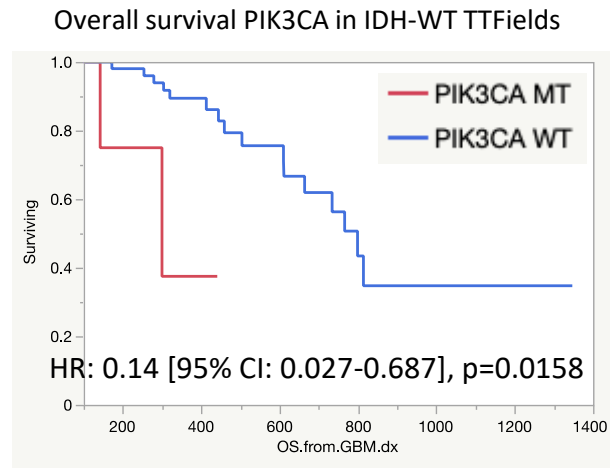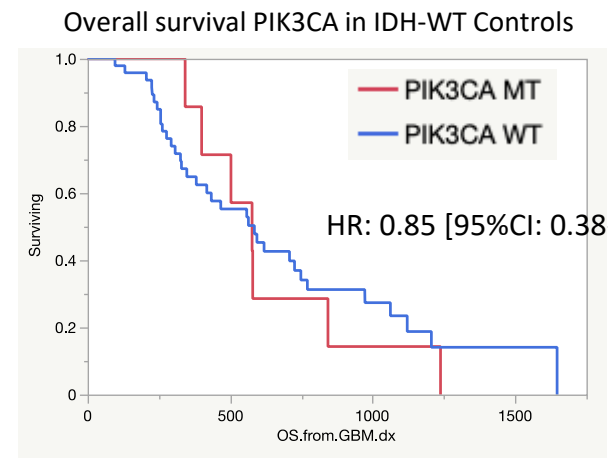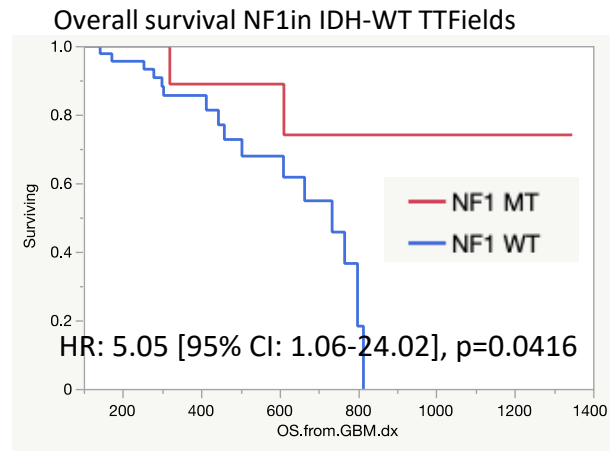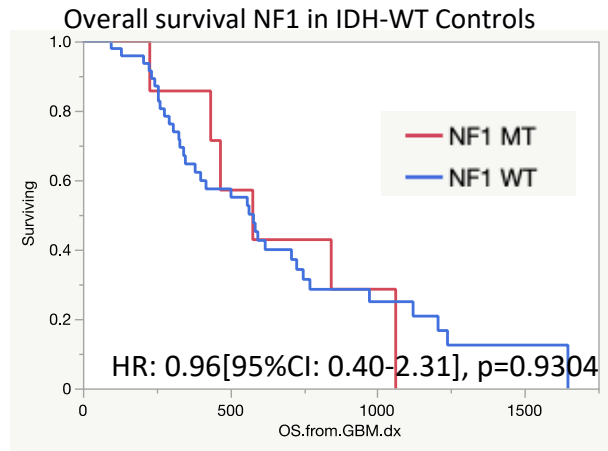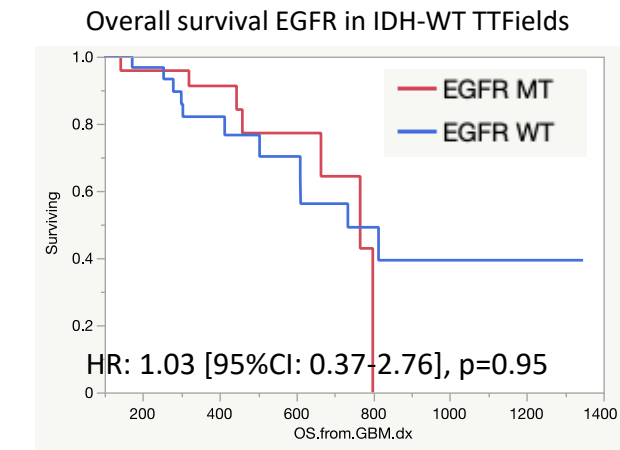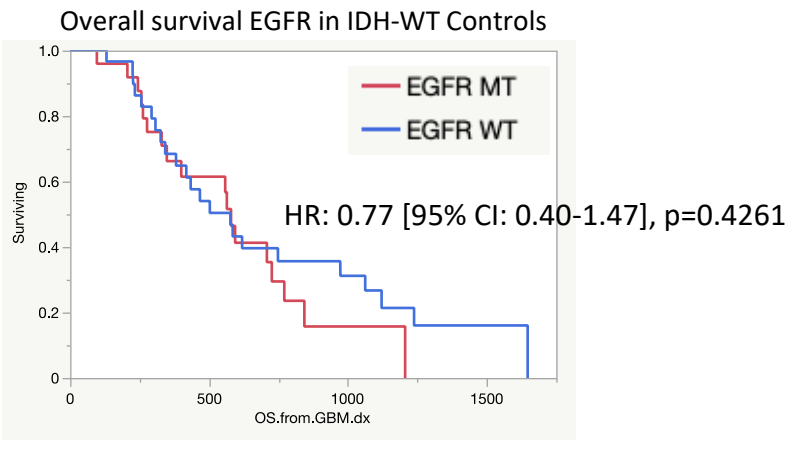

# Supplemental Figure 7

E

Overall survival Score high vs. low in IDH-WT TTFIELDS

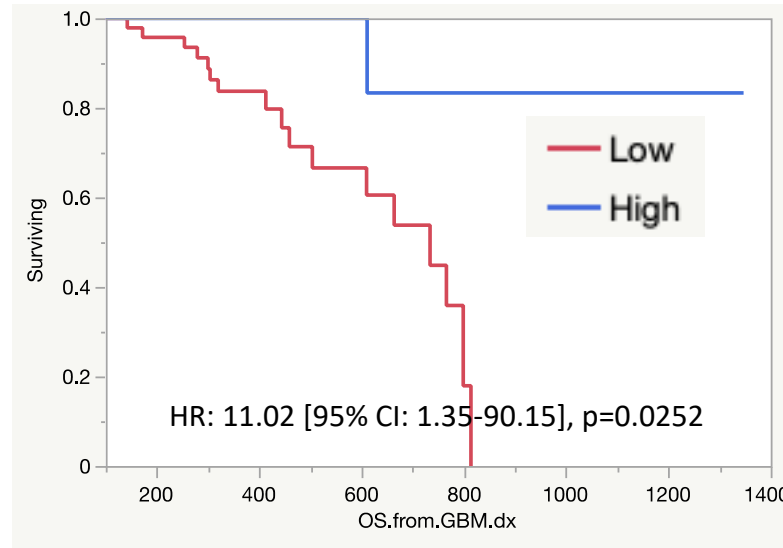

Overall survival Score high vs. low in IDH-WT Controls

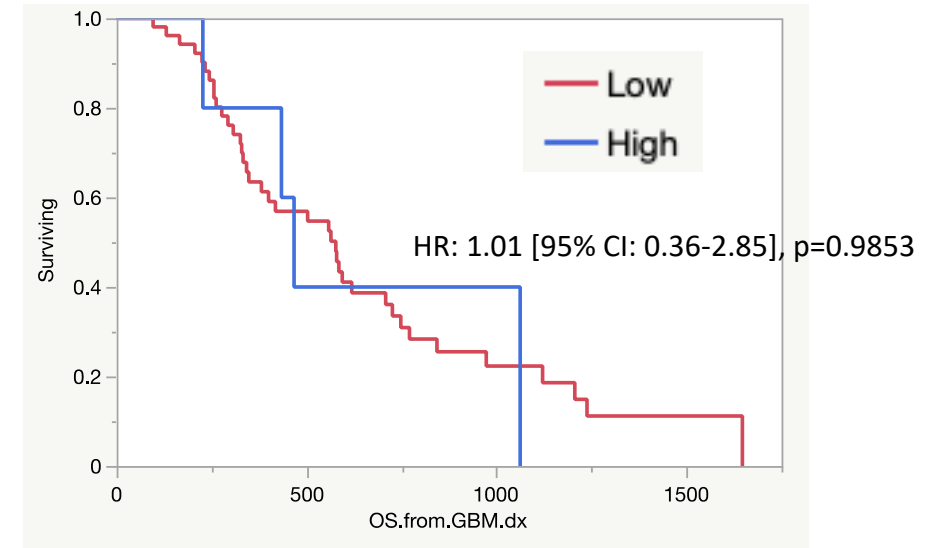

Progression-free survival Score high vs. low in IDH-WT TTFIELDS

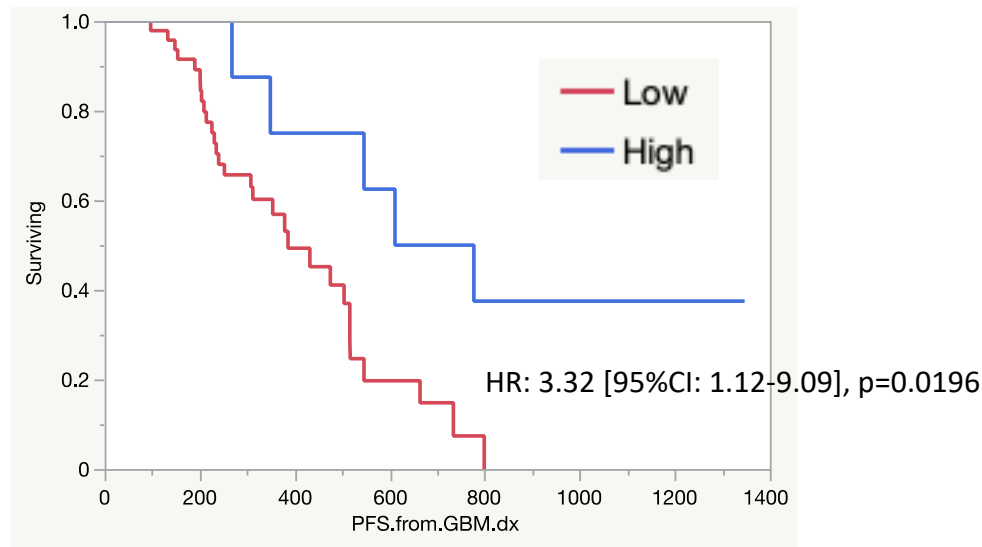

Progression-free survival Score high vs. low in IDH-WT Controls

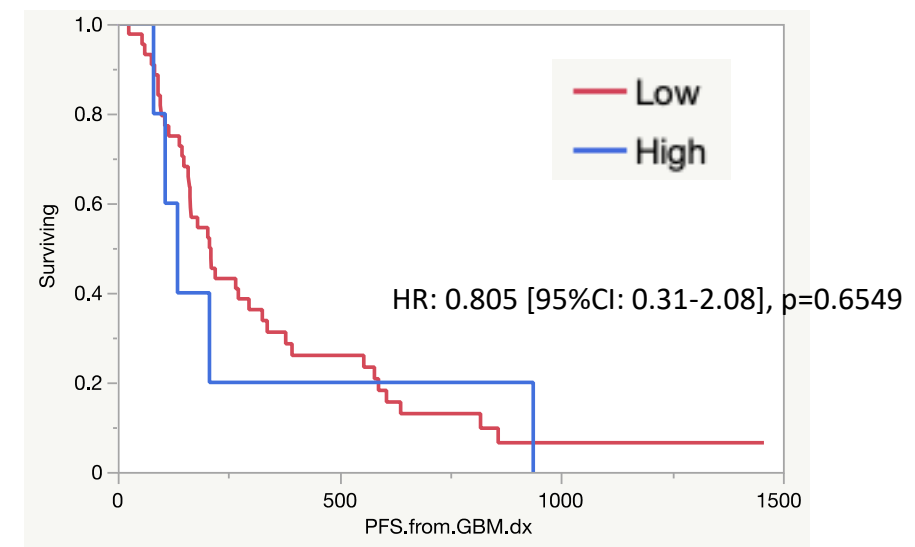

Supplement: vdac096_suppl_supplementary_material.pdf [file vdac096_suppl_supplementary_material.pdf]
