# Supplementary material for: Molecular alterations associated with improved outcome in patients with glioblastoma treated with Tumor-Treating Fields
Source: PubMed Central journal article supplement (PMC9270729; doi:10.1093/noajnl/vdac096), 2022-06-21
Supplement: vdac096_suppl_supplementary_table_s1.pdf [file vdac096_suppl_supplementary_table_s1.pdf]

Supplemental table 1

|                                 | Progression Free Survival |               | Interaction p-value<br>(Biomarker and therapy) | Overall Survival |               | Interaction p-value<br>(Biomarker and therapy) |
|---------------------------------|---------------------------|---------------|------------------------------------------------|------------------|---------------|------------------------------------------------|
|                                 | TTFIELDS treated          | Control       |                                                | TTFIELDS treated | Control       |                                                |
| <b>PIK3CA Mutated</b>           | 6.7m                      | 11.2m         | 0.0200                                         | 10.0m            | 19.2m         | 0.1196                                         |
| <b>PIK3CA Wild type</b>         | 16.8m                     | 6.0m          |                                                | 26.6 m           | 19.5m         |                                                |
| <b><i>P values [Cox PH]</i></b> | <i>0.0008</i>             | <i>0.6541</i> |                                                | <i>0.0158</i>    | <i>0.6695</i> |                                                |
| <b><i>HR</i></b>                | <i>7.33</i>               | <i>0.83</i>   |                                                | <i>7.38</i>      | <i>1.20</i>   |                                                |
| <b><i>Lower 95%</i></b>         | <i>2.29</i>               | <i>0.36</i>   |                                                | <i>1.46</i>      | <i>0.53</i>   |                                                |
| <b><i>Upper 95%</i></b>         | <i>23.53</i>              | <i>1.88</i>   |                                                | <i>37.40</i>     | <i>2.72</i>   |                                                |
| <b>NF1 Alteration</b>           | 18.2m                     | 6.9m          |                                                | 0.3549           | NR            |                                                |
| <b>NF1 Intact</b>               | 14.4m                     | 6.9m          | 24.7m                                          |                  | 19.2m         |                                                |
| <b><i>P values [Cox PH]</i></b> | <i>0.0744</i>             | <i>0.8933</i> | <i>0.0415</i>                                  |                  | <i>0.8902</i> |                                                |
| <b><i>HR</i></b>                | <i>0.45</i>               | <i>1.06</i>   | <i>0.20</i>                                    |                  | <i>1.06</i>   |                                                |
| <b><i>Lower 95%</i></b>         | <i>0.19</i>               | <i>0.47</i>   | <i>0.04</i>                                    |                  | <i>0.44</i>   |                                                |
| <b><i>Upper 95%</i></b>         | <i>1.08</i>               | <i>2.40</i>   | <i>0.94</i>                                    |                  | <i>2.56</i>   |                                                |
| <b>EGFR Mutated</b>             | 12.6m                     | 6.9m          | 0.7821                                         | 25.3m            | 19.2m         | 0.5290                                         |
| <b>EGFR Intact</b>              | 17.2m                     | 6.9m          |                                                | 24.5m            | 19.3m         |                                                |
| <b><i>P values [Cox PH]</i></b> | <i>0.3628</i>             | <i>0.3776</i> |                                                | <i>0.9462</i>    | <i>0.5149</i> |                                                |
| <b><i>HR</i></b>                | <i>1.37</i>               | <i>1.32</i>   |                                                | <i>0.97</i>      | <i>1.24</i>   |                                                |
| <b><i>Lower 95%</i></b>         | <i>0.70</i>               | <i>0.71</i>   |                                                | <i>0.36</i>      | <i>0.65</i>   |                                                |
| <b><i>Upper 95%</i></b>         | <i>2.69</i>               | <i>2.49</i>   |                                                | <i>2.58</i>      | <i>2.39</i>   |                                                |
